# Supplementary material
Source: PubMed Central journal article supplement (PMC7770608)

**A**

**No coating**

**E-cadherin**

**$\beta$ -catenin**

**Merge with DAPI**

**Vector**

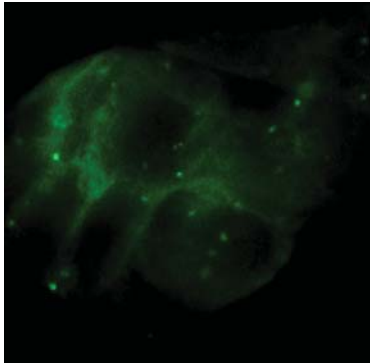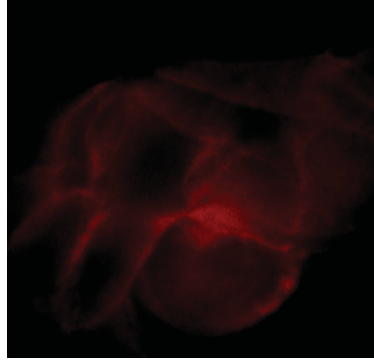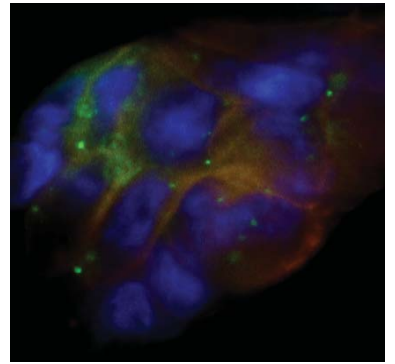

**NGAL high(N11)**

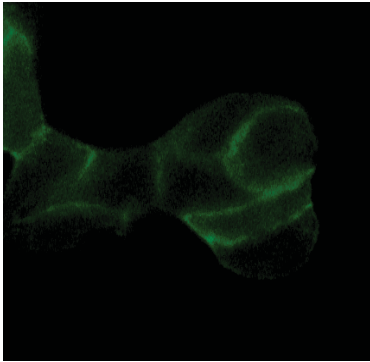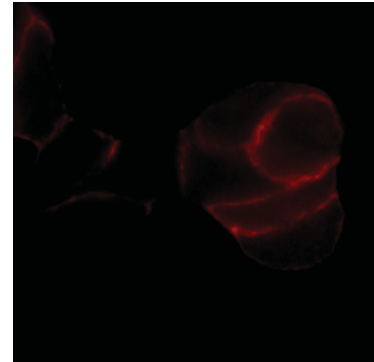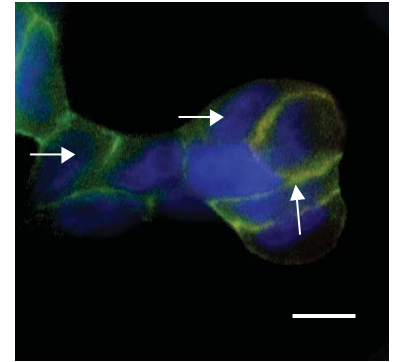

**Collagen IV**

**E-cadherin**

**$\beta$ -catenin**

**Merge with DAPI**

**Parental**

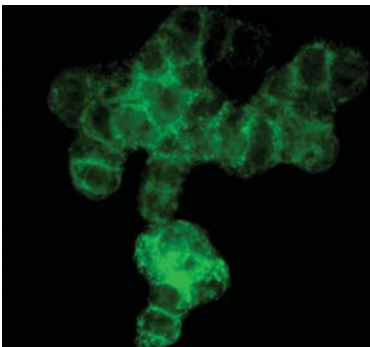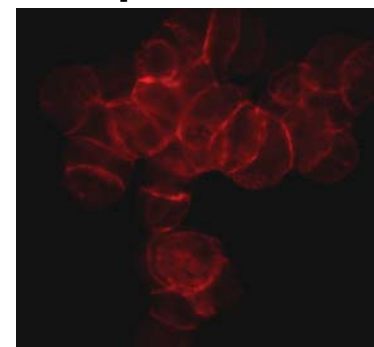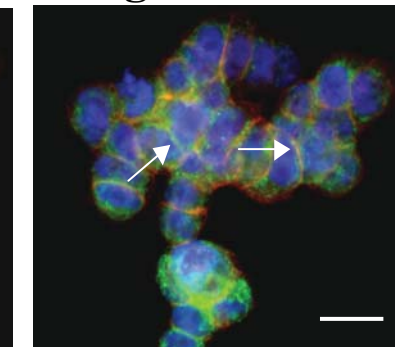

**NGAL low (N22)**

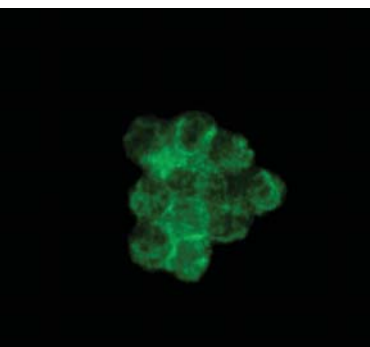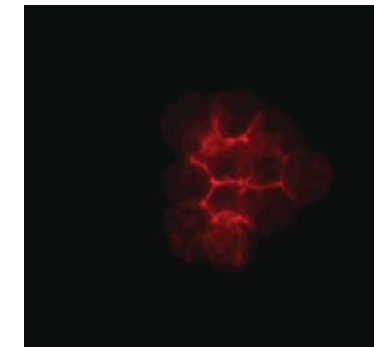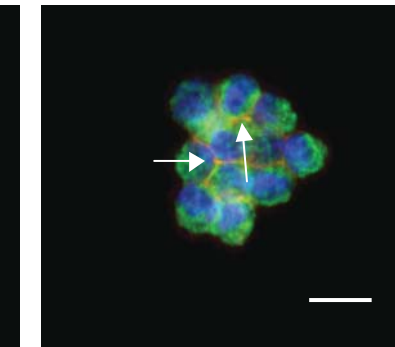

Supplement: NIHMS93950-supplement-3.pdf [file NIHMS93950-supplement-3.pdf]
