# Supplementary material
Source: PubMed Central journal article supplement (PMC7770608)

# Supplemental Fig. S 1

## A

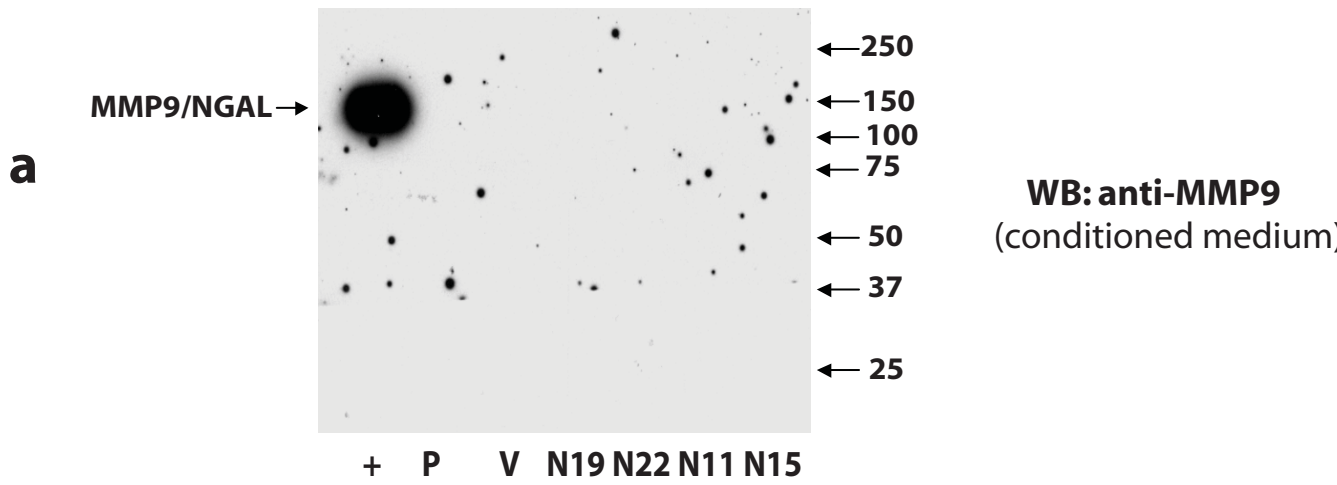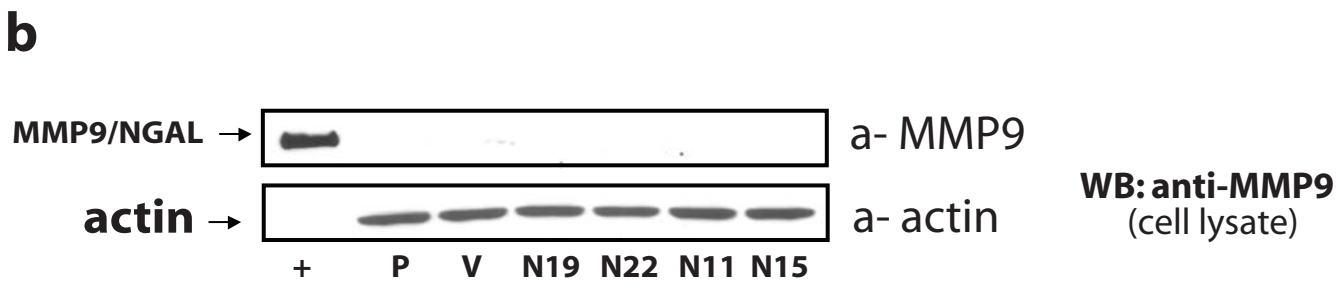

## C

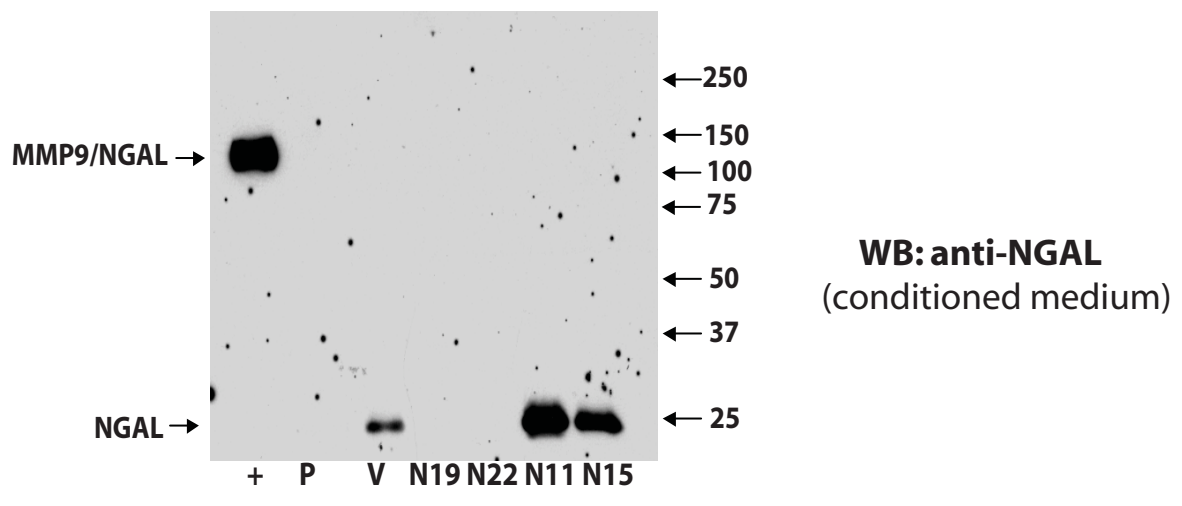

## B

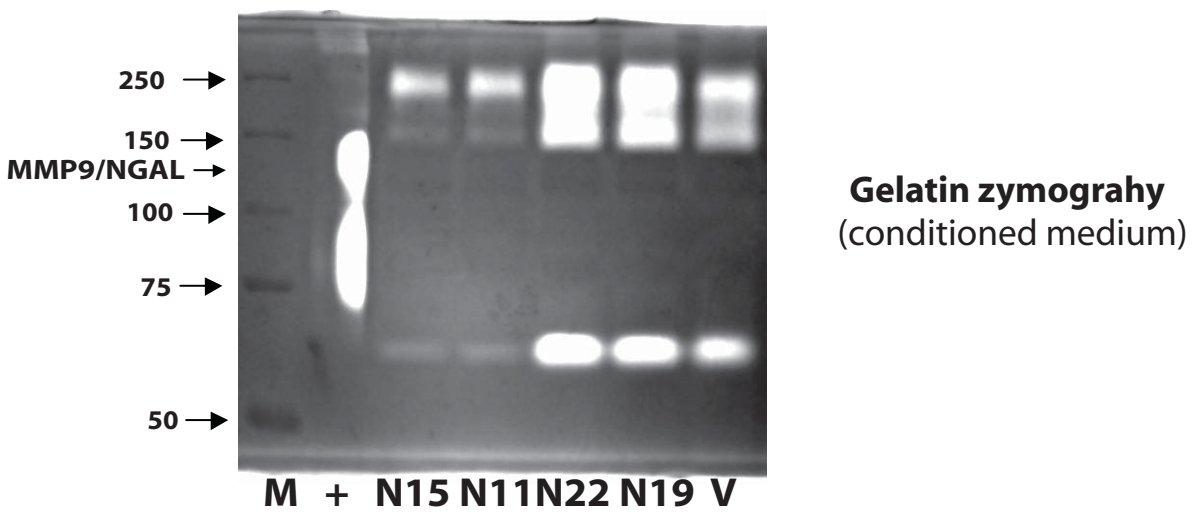

Supplement: NIHMS93950-supplement-2.pdf [file NIHMS93950-supplement-2.pdf]
